# Supplementary material for: Evaluation of Antioxidant Effects of Pumpkin (Cucurbita pepo L.) Seed Extract on Aging- and Menopause-Related Diseases Using Saos-2 Cells and Ovariectomized Rats
Source: MDPI journal article supplement (doi:10.3390/antiox13020241), 2024-02-16
Supplement: s1 [file s1]

**Table S1.** Sequences of primers used for qRT-PCR analysis

| Target gene   | Accession number | Forward (5'-3')       | Reverse (5'-3')            |
|---------------|------------------|-----------------------|----------------------------|
| <i>Nrf2</i>   | NM_031789        | CCATTACGGAGACCCAC     | TGAGCGGCAACTTTATTC         |
| <i>Ho-1</i>   | NM_012580.2      | TGCTCGCATGAACACTCTG   | TCCTCTGTCAGCAGTGCCT        |
| <i>Gpx</i>    | NM_030826.4      | CTCTCCGCGGTGGCACAGT   | CCACCACCGGGTCGGACATAC      |
| <i>Cat</i>    | NM_012520.2      | GCGAATGGAGAGGCAGTGTAC | GAGTGACGTTGTCTTCATTAGCACTG |
| <i>eNOS</i>   | NM_008713.4      | ATGGATGAGCCAACTCAAGG  | CTGTCCTCAGGAGGTCTTGC       |
| <i>iNOS</i>   | NM_012611.3      | CTTGCCCCTGGAAGTTTCTC  | GCACCTGGGGTTTTCTCCAC       |
| <i>Pparg</i>  | NM_011146.3      | CACCAACTTCGGAATCAGCTC | CAACCATTGGGTCAGCTCTTG      |
| <i>Pgc1α</i>  | NM_176075.2      | TTGCCCAGATCTTCCTGAAC  | TGAGGACCGCTAGCAAGTTT       |
| <i>Prdm16</i> | NM_022687.2      | AGACCGAGGACGGTATCCTG  | TGGTATGGAGGACTCTCGCA       |
| <i>Gapdh</i>  | NM_017008.4      | CCGTGTTCTACCCCCAATG   | GTTGCTGTTGAAGTCGCAGG       |

Abbreviations: *Nrf2*, nuclear factor erythroid 2-related factor; *Ho-1*, Heme oxygenase-1; *Gpx*, Glutathione peroxidase; *Cat*, Catalase; *eNos*, endothelial nitric oxide synthase; *iNos*, inducible nitric oxide synthase; *Pparg*, peroxisome proliferator-activated receptor gamma; *Pgc1α*, Peroxisome proliferator-activated receptor-gamma coactivator; *Prdm16*, PR/SET Domain 16; *Gapdh*, Glyceraldehyde-3-phosphate dehydrogenase.
